# Supplementary material for: CXCL12-CXCR7 axis contributes to the invasive phenotype of pancreatic cancer
Source: PubMed Central journal article supplement (PMC5308707; doi:10.18632/oncotarget.11330), 2016-08-17
Supplement: oncotarget-07-62006-s001.pdf [file oncotarget-07-62006-s001.pdf]

## CXCL12-CXCR7 axis contributes to the invasive phenotype of pancreatic cancer

### SUPPLEMENTARY FIGURES AND TABLES

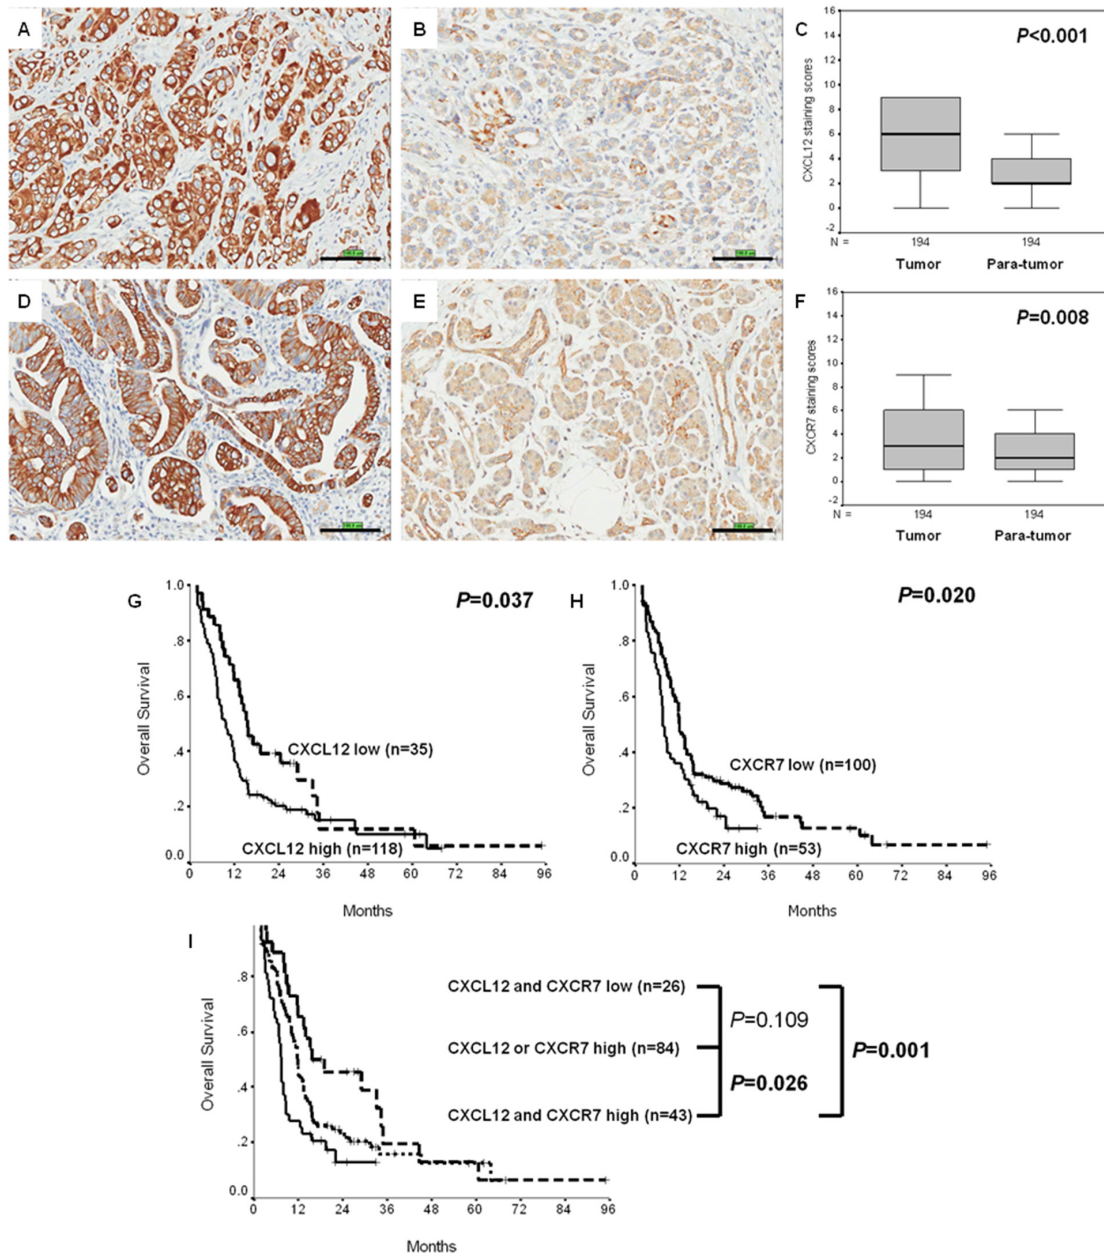

**Supplementary Figure S1: Expression, clinicopathologic and prognostic significances of CXCL12 and CXCR7 in Shanghai cohort of PC.** **A.** High CXCL12 expression in tumor tissues ( $\times 200$ ). **B.** High CXCL12 expression in non-tumor tissues ( $\times 200$ ). **C.** Staining ranks of CXCL12 in tumor tissues were statistically higher than those in non-tumor ones. **D.** High CXCR7 expression in tumor tissues ( $\times 200$ ). **E.** High CXCR7 expression in non-tumor tissues ( $\times 200$ ). **F.** Staining ranks of CXCR7 in tumor tissues were statistically higher than those in non-tumor ones. **G.** High CXCL12 expression in tumor tissues predicted poor overall survival. **H.** High CXCR7 expression in tumor tissues predicted poor overall survival. **I.** Coexpression of CXCL12 and CXCR7 carried poorest overall survival (The upper line: CXCL12 and CXCR7 low; the medial line: CXCL12 or CXCR7 high; the nether line: CXCL12 and CXCR7 high).

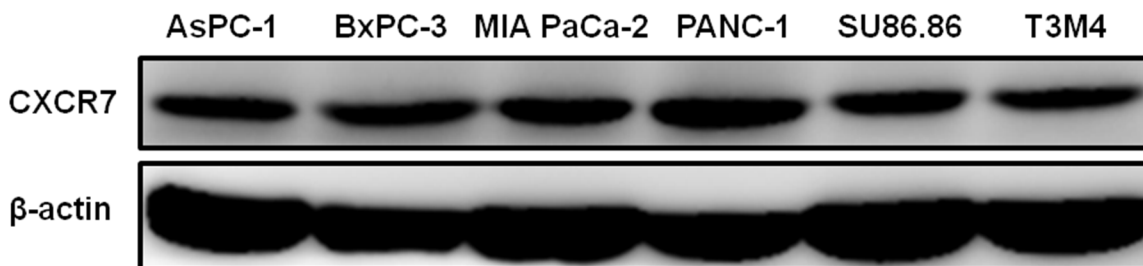

Supplementary Figure S2: Baseline expression of CXCR7 in six PC cell lines.

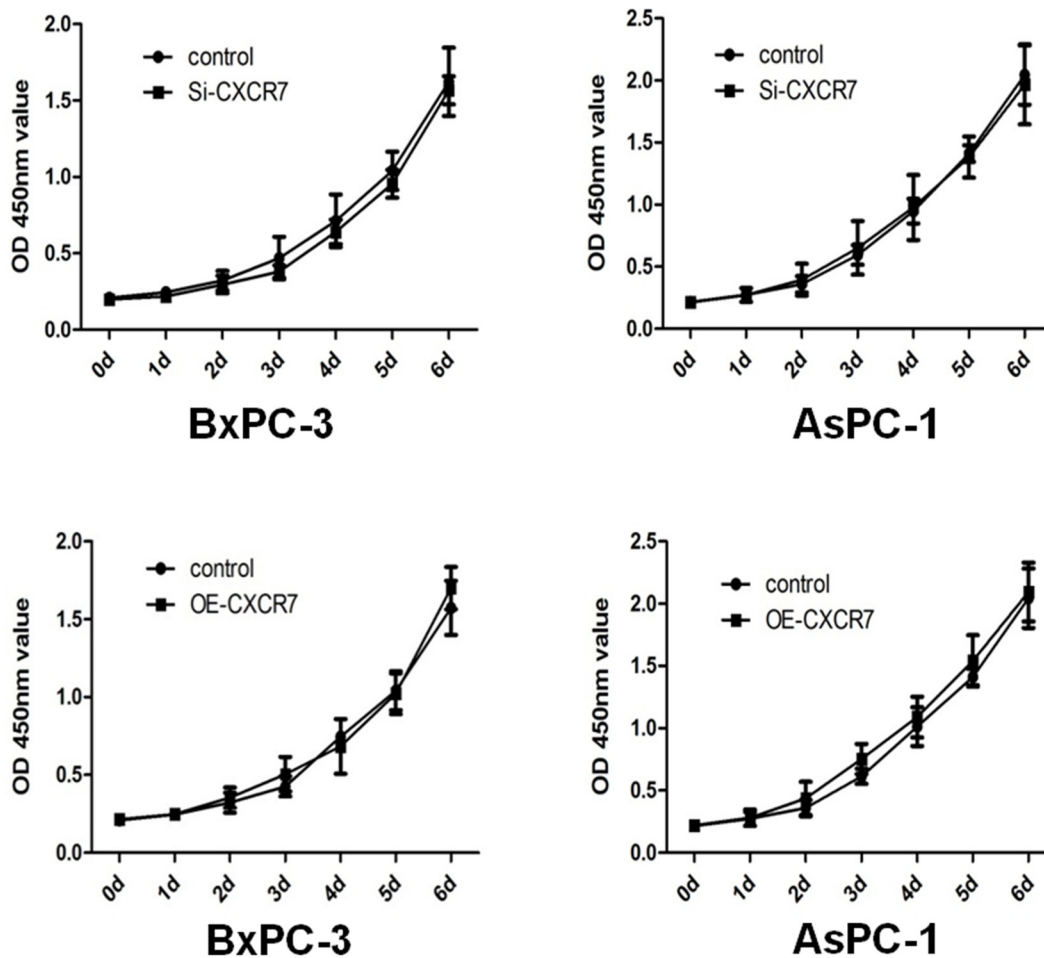

Supplementary Figure S3: Stable silence and overexpression of CXCR7 do not affect proliferation in PC cells.

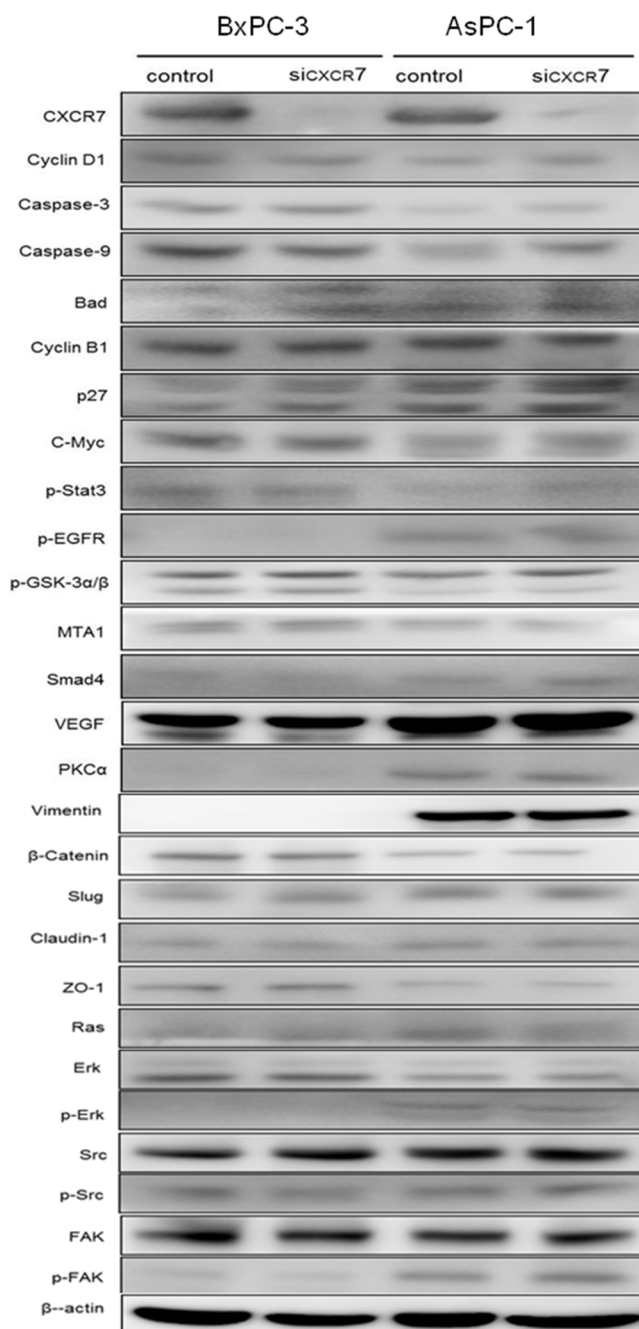

Supplementary Figure S4: Stable silence of CXCR7 does not influence expression and phosphorylation of a panel of proteins in PC cells.

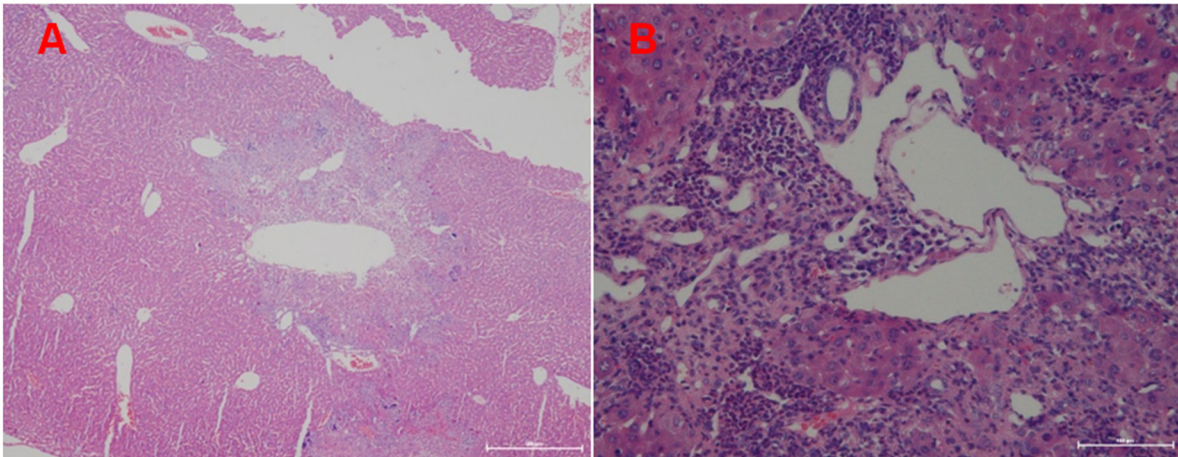

**Supplementary Figure S5: Hepatic metastasis of PC in nude mice. A.** Liver tissue with a metastatic lesion ( $\times 40$ ). **B.** Metastatic lesion ( $\times 200$ ).

Supplementary Table S1: CXCL12/CXCR7 expression and clinicopathologic variables of PC (Beijing cohort)

| Variables          | n   | CXCL12 expression |     | P            | CXCR7 expression |     | P            |
|--------------------|-----|-------------------|-----|--------------|------------------|-----|--------------|
|                    |     | High              | Low |              | High             | Low |              |
| Age                |     |                   |     | 0.276        |                  |     | 0.738        |
| ≥65 years          | 77  | 51                | 26  |              | 30               | 47  |              |
| <65 years          | 158 | 93                | 65  |              | 58               | 100 |              |
| Sex                |     |                   |     | 0.255        |                  |     | 0.147        |
| Male               | 150 | 96                | 54  |              | 51               | 99  |              |
| Female             | 85  | 48                | 37  |              | 37               | 48  |              |
| Tumor location     |     |                   |     | 0.216        |                  |     | 0.659        |
| Head               | 140 | 83                | 57  |              | 51               | 89  |              |
| Non-head           | 89  | 60                | 29  |              | 35               | 54  |              |
| Tumor size         |     |                   |     | 0.968        |                  |     | 0.403        |
| >4cm               | 89  | 55                | 34  |              | 30               | 59  |              |
| ≤4cm               | 143 | 88                | 55  |              | 56               | 87  |              |
| Histological grade |     |                   |     | <b>0.019</b> |                  |     | 0.392        |
| G1-2               | 154 | 87                | 67  |              | 60               | 94  |              |
| G3-4               | 64  | 47                | 17  |              | 21               | 43  |              |
| Vessel invasion    |     |                   |     | <b>0.007</b> |                  |     | <b>0.022</b> |
| Present            | 102 | 73                | 29  |              | 46               | 56  |              |
| Absent             | 131 | 71                | 60  |              | 40               | 91  |              |
| T stage            |     |                   |     | 0.116        |                  |     | 0.081        |
| T1-2               | 141 | 92                | 49  |              | 46               | 95  |              |
| T3                 | 91  | 50                | 41  |              | 40               | 51  |              |
| N stage            |     |                   |     | 0.583        |                  |     | 0.939        |
| N0                 | 117 | 68                | 49  |              | 43               | 74  |              |
| N1                 | 102 | 63                | 39  |              | 38               | 64  |              |

NOTE: Partial data are not available, and statistics were based on available data. *P* values were derived from the Pearson Chi-square test (two-tailed).

Supplementary Table S2: CXCL12/CXCR7 expression and clinicopathologic variables of PC (Shanghai cohort)

| Variables          | n   | CXCL12 expression |     |              | CXCR7 expression |     |              |
|--------------------|-----|-------------------|-----|--------------|------------------|-----|--------------|
|                    |     | High              | Low | <i>P</i>     | High             | Low | <i>P</i>     |
| Age                |     |                   |     | 0.125        |                  |     | 0.558        |
| ≥65 years          | 105 | 79                | 26  |              | 36               | 69  |              |
| <65 years          | 89  | 58                | 31  |              | 27               | 62  |              |
| Sex                |     |                   |     | 0.932        |                  |     | <b>0.033</b> |
| Male               | 108 | 76                | 32  |              | 42               | 66  |              |
| Female             | 86  | 61                | 25  |              | 21               | 65  |              |
| Tumor location     |     |                   |     | 0.545        |                  |     | 0.364        |
| Head               | 130 | 90                | 40  |              | 45               | 85  |              |
| Non-head           | 64  | 47                | 17  |              | 18               | 46  |              |
| Tumor size         |     |                   |     | 0.995        |                  |     | 0.190        |
| >4cm               | 68  | 48                | 20  |              | 18               | 50  |              |
| ≤4cm               | 126 | 89                | 37  |              | 45               | 81  |              |
| Histological grade |     |                   |     | 0.400        |                  |     | <b>0.045</b> |
| G1-2               | 124 | 85                | 39  |              | 34               | 90  |              |
| G3-4               | 70  | 52                | 18  |              | 29               | 41  |              |
| Vessel invasion    |     |                   |     | <b>0.047</b> |                  |     | <b>0.003</b> |
| Present            | 33  | 28                | 5   |              | 18               | 15  |              |
| Absent             | 160 | 108               | 52  |              | 45               | 115 |              |
| T stage            |     |                   |     | 0.529        |                  |     | 0.272        |
| T1-2               | 26  | 17                | 9   |              | 6                | 20  |              |
| T3                 | 168 | 120               | 48  |              | 57               | 111 |              |
| N stage            |     |                   |     | 0.409        |                  |     | 0.486        |
| N0                 | 132 | 90                | 42  |              | 41               | 91  |              |
| N1                 | 58  | 43                | 15  |              | 21               | 37  |              |

NOTE: Partial data are not available, and statistics were based on available data. *P* values were derived from the Pearson Chi-square test (two-tailed).

Supplementary Table S3: Univariate and multivariate analyses of prognostic factors of PC (Shanghai cohort)

| Variables          | n   | Univariate |           |              | Multivariate |             |              |
|--------------------|-----|------------|-----------|--------------|--------------|-------------|--------------|
|                    |     | median±SE  | 95% CI    | P            | HR           | 95% CI      | P            |
| Age                |     |            |           | 0.075        |              |             |              |
| ≥65 years          | 90  | 8.7±2.4    | 6.0-11.4  |              |              |             |              |
| <65 years          | 63  | 13.2±1.2   | 10.8-15.6 |              |              |             |              |
| Sex                |     |            |           | 0.263        |              |             |              |
| Male               | 84  | 10.9±1.0   | 8.9-12.9  |              |              |             |              |
| Female             | 69  | 11.5±1.9   | 7.8-15.2  |              |              |             |              |
| Tumor location     |     |            |           | 0.715        |              |             |              |
| Head               | 102 | 11.5±1.0   | 9.6-13.4  |              |              |             |              |
| Non-head           | 51  | 10.3±1.3   | 7.7-12.9  |              |              |             |              |
| Tumor size         |     |            |           | 0.180        |              |             |              |
| >4cm               | 50  | 8.3±1.4    | 5.5-11.1  |              |              |             |              |
| ≤4cm               | 103 | 12.0±0.9   | 10.3-13.7 |              |              |             |              |
| Histological grade |     |            |           | <b>0.001</b> |              |             | <b>0.035</b> |
| G1-2               | 93  | 12.4±1.2   | 10.0-14.8 |              | 1            |             |              |
| G3-4               | 60  | 8.0±0.7    | 6.6-9.4   |              | 1.527        | 1.030-2.263 |              |
| Vessel invasion    |     |            |           | <b>0.017</b> |              |             |              |
| Present            | 26  | 6.8±1.1    | 4.7-8.9   |              |              |             |              |
| Absent             | 126 | 11.7±0.8   | 10.0-13.4 |              |              |             |              |
| T stage            |     |            |           | 0.325        |              |             |              |
| T1-2               | 19  | 14.0±2.7   | 8.7-19.3  |              |              |             |              |
| T3                 | 134 | 10.3±1.0   | 8.4-12.2  |              |              |             |              |
| N stage            |     |            |           | <b>0.033</b> |              |             | <b>0.037</b> |
| N0                 | 100 | 12.0±1.0   | 10.0-14.0 |              | 1            |             |              |
| N1                 | 50  | 8.5±1.2    | 6.1-10.9  |              | 1.508        | 1.025-2.220 |              |
| Tumoral CXCL12     |     |            |           | <b>0.037</b> |              |             | 0.054        |
| High               | 118 | 9.6±1.1    | 7.5-11.7  |              | 1.513        | 0.992-2.305 |              |
| Low                | 35  | 15.4±1.7   | 12.1-18.7 |              | 1            |             |              |
| Tumoral CXCR7      |     |            |           | <b>0.020</b> |              |             | 0.062        |
| High               | 53  | 7.5±0.6    | 6.4-8.6   |              | 1.451        | 0.982-2.144 |              |
| Low                | 100 | 11.9±0.9   | 10.2-13.6 |              | 1            |             |              |

NOTE: Partial data are not available, and statistics were based on available data. *P* values were derived from the Log-rank test (univariate) and Cox regression analysis (multivariate).
